# Supplementary material for: Dynamics and mechanism of liquid film collapse in a foam
Source: Royal Society of Chemistry journal article supplement (doi:10.1039/d0sm02153a), 2021-01-01
Supplement: d0sm02153a1.pdf [file d0sm02153a1.pdf]

## Supplementary Information for

### “Dynamics and mechanism of liquid film collapse in a foam”

Naoya Yanagisawa, Marie Tani and Rei Kurita

Department of Physics, Tokyo Metropolitan University, Tokyo 192-0397, Japan

**(Supplementary Movie 1) The enlarged movie of liquid film collapsing process during the CBC in 14 wt% TTAB solution from time  $t = 0$  ms to  $t = 3.91$  ms for  $\phi = 0.0090$  and  $h = 2.1$  mm.**

This movie is same as figures 2(a)~(f) in the main manuscript.

**(Supplementary Movie 2) The enlarged movie of RVPB oscillation from time  $t = 0$  ms to  $t = 4.78$  ms for  $\phi = 0.012$  and  $h = 2.1$  mm.**

Here RVPB is not migrated and stays at the same position. This movie is same as figures 3(a)~(e) in the main manuscript.

**(Supplementary Movie 3) The enlarged movie of vertical PB oscillation from time  $t = 0$  ms to  $t = 5.65$  ms for  $\phi = 0.0047$  and  $h = 2.1$  mm.**

It is found that the liquid aggregating at the center of vertical PB starts to relax and flow to the upper or lower PB after some critical time.

**(Supplementary Movie 4) The enlarged movie of liquid film collapsing process during the CBC from time  $t = 0$  ms to  $t = 13.1$  ms for  $\phi = 0.0097$  and  $h = 1.1$  mm.**

It is found that the collapse front becomes flat earlier and droplets are emitted diagonally to the direction of the liquid film.

**(Supplementary Movie 5) The enlarged movie of liquid film collapsing process during the CBC in a three-dimensional foam from time  $t = 0$  ms to  $t = 3.0$  ms for  $\phi = 0.0075$  and  $h = 9.1$  mm.**

Several bubbles are contained in the thickness direction. It is found that the collapse of the liquid

film and the droplet formation are observed.

**(Supplementary Movie 6) The enlarged movie of liquid film collapsing process during the CBC in 0.24 wt% TTAB solution from time  $t = 0$  ms to  $t = 3.04$  ms for  $\phi = 0.0056$  and  $h = 2.1$  mm.**

**(Supplementary Movie 7) The enlarged movie of liquid film collapsing process during the CBC in 2 wt% C<sub>10</sub>E<sub>3</sub> solution from time  $t = 0$  ms to  $t = 3.91$  ms for  $\phi = 0.023$  and  $h = 2.1$  mm.**

**(Supplementary Movie 8) The enlarged movie of RVPB oscillation in 25 wt% aqueous solution of household detergent from time  $t = 0$  ms to  $t = 10.9$  ms for  $\phi = 0.0039$  and  $h = 2.1$  mm.**

**(Supplementary Movie 9) The enlarged movie of liquid film bursting and RVPB oscillation inside the foam in 0.24 wt% TTAB solution from time  $t = 0$  ms to  $t = 3.91$  ms for  $\phi = 0.0087$  and  $h = 2.1$  mm.**

All these supplementary movies are taken by using a high speed camera with the frame rate 23000 fps.
